# Supplementary material
Source: publisher figshare collection journal article supplement (https://karger.figshare.com/articles/dataset/_/21923130)
Supplement: Supplementary file 1 [file 1]

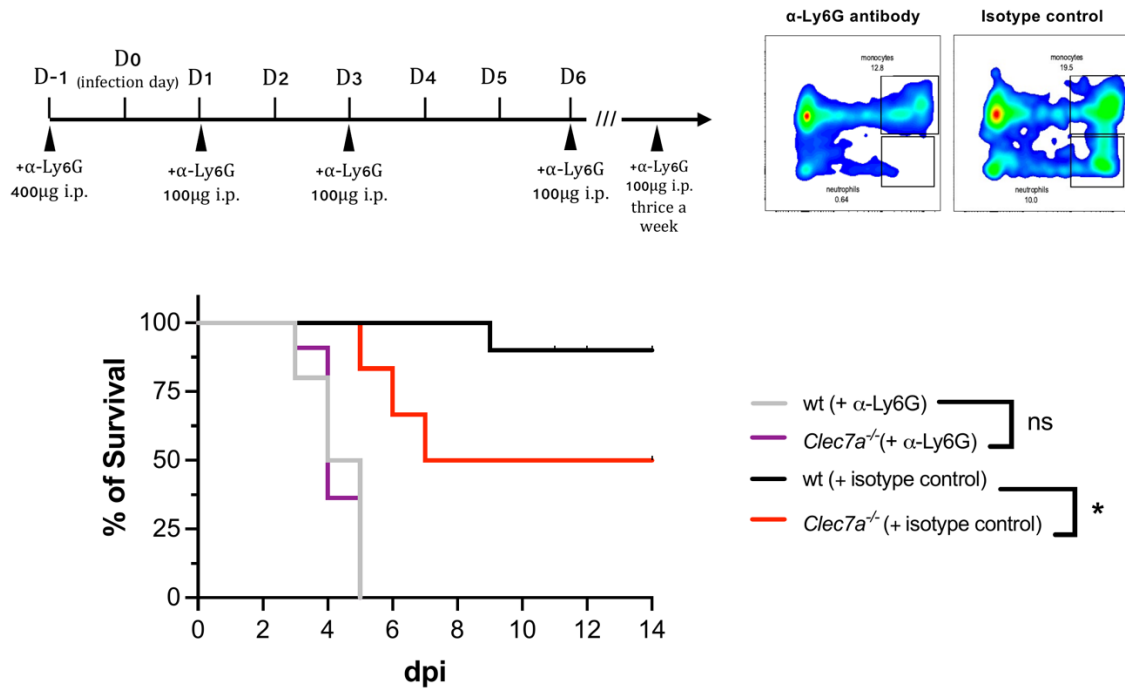

**Supplementary Figure 7**

**Supplementary Fig 7. Neutropenic mice display enhanced susceptibility to *A. fumigatus* challenge.**

wt or *Clec7a*<sup>-/-</sup> mice were challenged with  $1 \times 10^6$  conidia of *A. fumigatus* and survival was monitored daily. Neutropenia was induced by anti-Ly6G antibody administration and confirmed by phenotyping in blood (neutrophils were considered CD45<sup>+</sup>CD11b<sup>+</sup>Gr-1<sup>+</sup>CCR2<sup>-</sup> to avoid the use of Ly6G-targeted antibody for phenotyping). Antibody-mediated neutrophil depletion scheme, *upper panel*. Survival plot, *lower panel*. Unpaired t-test: Log-Rank test: \*  $p < 0.05$ .  $N = 10-11$  animals/group.
