# Supplementary material
Source: publisher figshare collection journal article supplement (https://karger.figshare.com/articles/dataset/_/21923130)
Supplement: Supplementary file 2 [file 1]

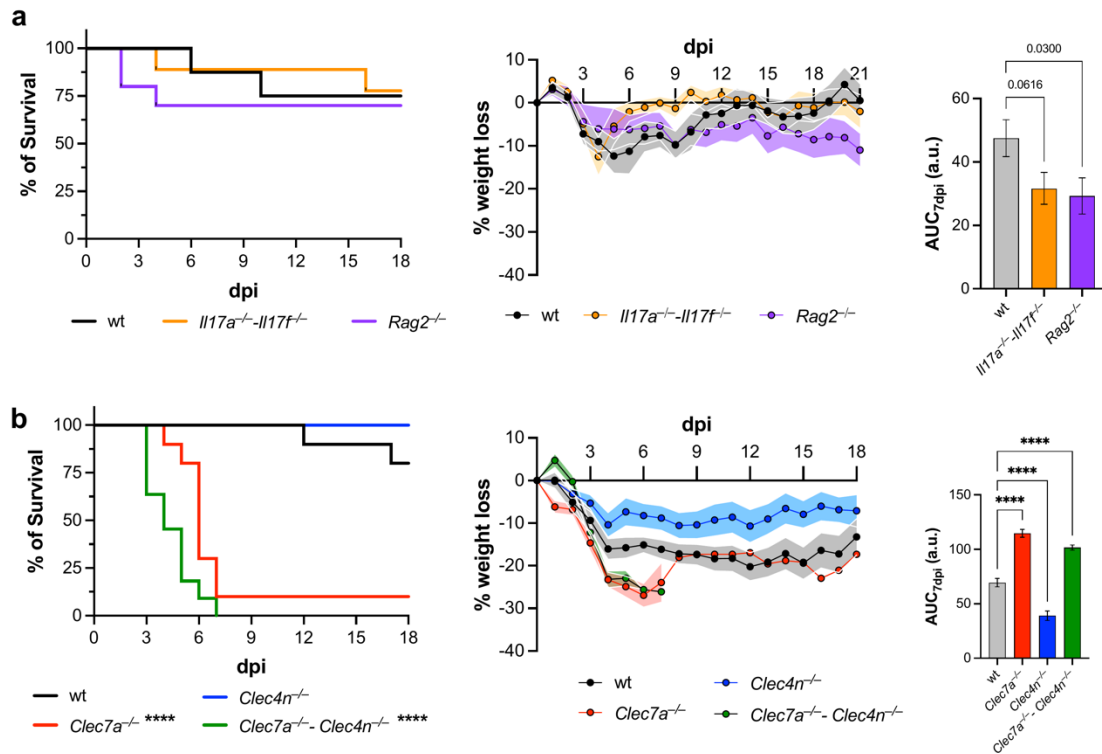

**Supplementary Figure 2**

**Supplementary Fig 2. Dectin-1 is required for protection against infection by *A. fumigatus* IFM47439.**

**a**, wt, *Il17a<sup>-/-</sup>Il17f<sup>-/-</sup>* and *Rag2<sup>-/-</sup>* mice were infected intravenously with  $1 \times 10^6$  *A. fumigatus* conidia. Body weight and survival were monitored for 21 days. **b**, wt, *Clec7a<sup>-/-</sup> Clec4n<sup>-/-</sup>*, *Clec7a<sup>-/-</sup>* and *Clec4n<sup>-/-</sup>* mice were infected intravenously with  $1 \times 10^6$  *A. fumigatus* conidia. Body weight and survival were monitored for 18 days. Left panels represent the survival plot of the groups, Log-Rank test: \*\*\*\*  $p < 0.0001$ . Right panels are the body weight loss (BWL) and area under the curve (AUC) plots, data are shown as mean  $\pm$  s.d.  $N = 7-16$  animals/group. One-way ANOVA and Fisher's LSD test: \*\*  $p < 0.01$ , \*\*\*\*  $p < 0.0001$ .
