# Supplementary material
Source: publisher figshare collection journal article supplement (https://karger.figshare.com/articles/dataset/_/21923130)
Supplement: Supplementary file 3 [file 1]

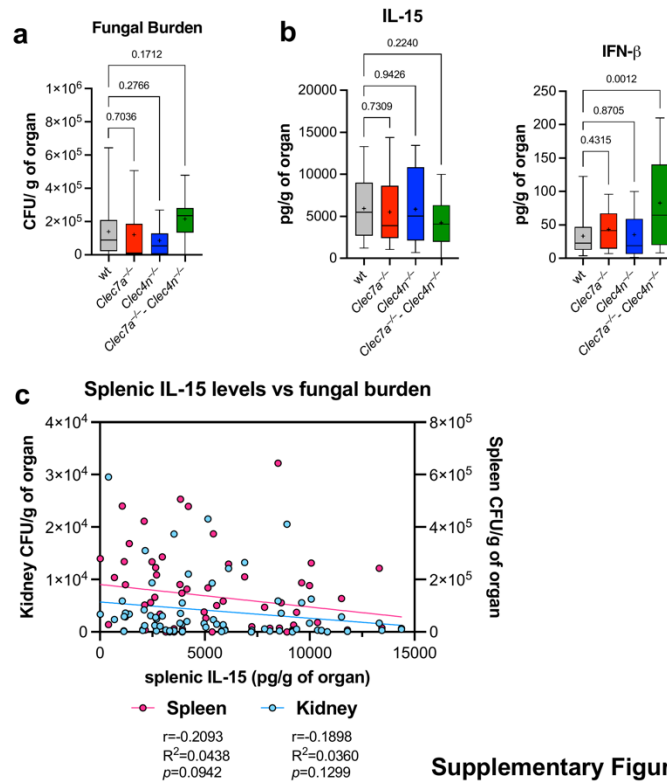

Supplementary Figure 3

**Supplementary Fig 3. Dectin-1/-2 do not participate in the splenic response to *A. fumigatus*.** Mice were infected intravenously with  $1 \times 10^6$  *A. fumigatus* conidia and analysis was performed in spleen macerates 5 days post-infection. **a**, fungal burden; **b**, levels of IL-15 and IFN- $\beta$  ( $N = 9-16$  animals/group, data pooled from two to three independent experiments, One-way ANOVA and Fisher's LSD test. **c**, Pearson correlation between fungal burden in kidney or spleen and splenic levels of IL-15.
