# Supplementary material
Source: publisher figshare collection journal article supplement (https://karger.figshare.com/articles/dataset/_/21923130)
Supplement: Supplementary file 4 [file 1]

## a Mycological parameters

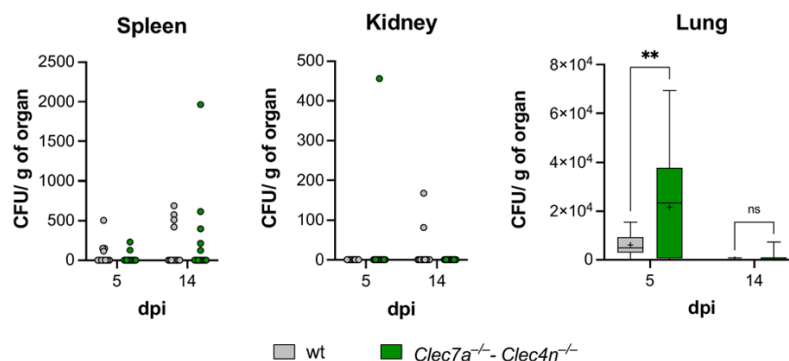

## b Clinical parameters

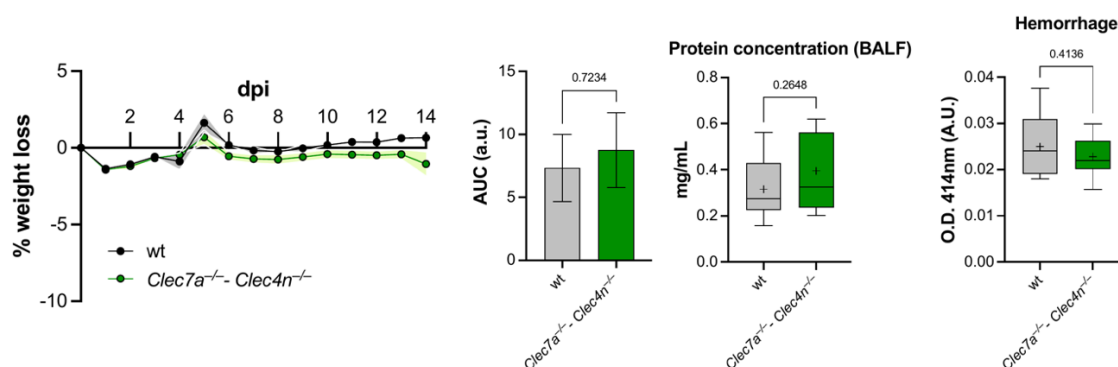

## c Immunological parameters

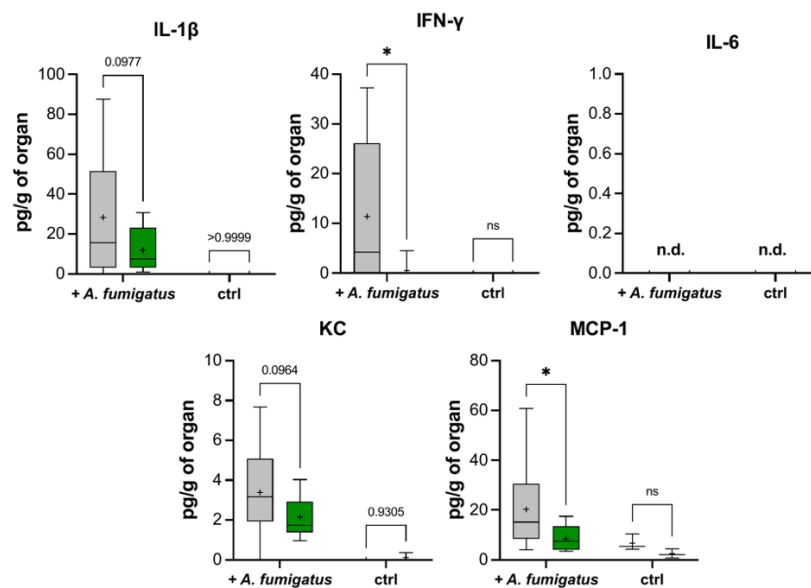

Supplementary Figure 1

**Supplementary Fig 1. *Clec7a*<sup>-/-</sup> - *Clec4n*<sup>-/-</sup> mice do not develop invasive lethal aspergillosis through intratracheal infection.** Wt and *Clec7a*<sup>-/-</sup> - *Clec4n*<sup>-/-</sup> mice were infected intratracheally with  $1 \times 10^7$  *A. fumigatus* conidia and followed for up to 14 days. **a**, Fungal burden was assessed in the spleen, kidneys, and lungs at 5 and 14 dpi (days post-infection) and expressed as the number of colony-forming units per gram of tissue. For spleen and kidney data, each symbol represents an individual value; for lungs, data are shown as boxplots (line indicates median and +, mean values).  $N=10-14$  animals/group pooled from three independent experiments Two-way ANOVA and Fisher's LSD test: \*\*  $p < 0.01$ . **b**, body weight variation was monitored through 14 days and expressed as body weight loss (BWL) and area under the curve (AUC) plots, data are shown as mean  $\pm$  s.d.  $N=22-23$  animals/group pooled from three independent experiments. Protein content was measured by Bradford assay and expressed as mg of protein/mL of BALF; hemorrhage was determined by BALF absorbance at 414nm at 5dpi. Data is shown as mean  $\pm$  s.d.  $N=9-12$  animals/group. Unpaired t-test: no significance found. **c**, Cytokines and chemokines were measured in lung macerates harvested 5 dpi by CBA assay and shown as mean  $\pm$  s.d.  $N=9-12$  animals/group. Two-way ANOVA and Fisher's LSD test: \*  $p < 0.05$ .
