# Supplementary material
Source: publisher figshare collection journal article supplement (https://karger.figshare.com/articles/dataset/_/21923130)
Supplement: Supplementary file 5 [file 1]

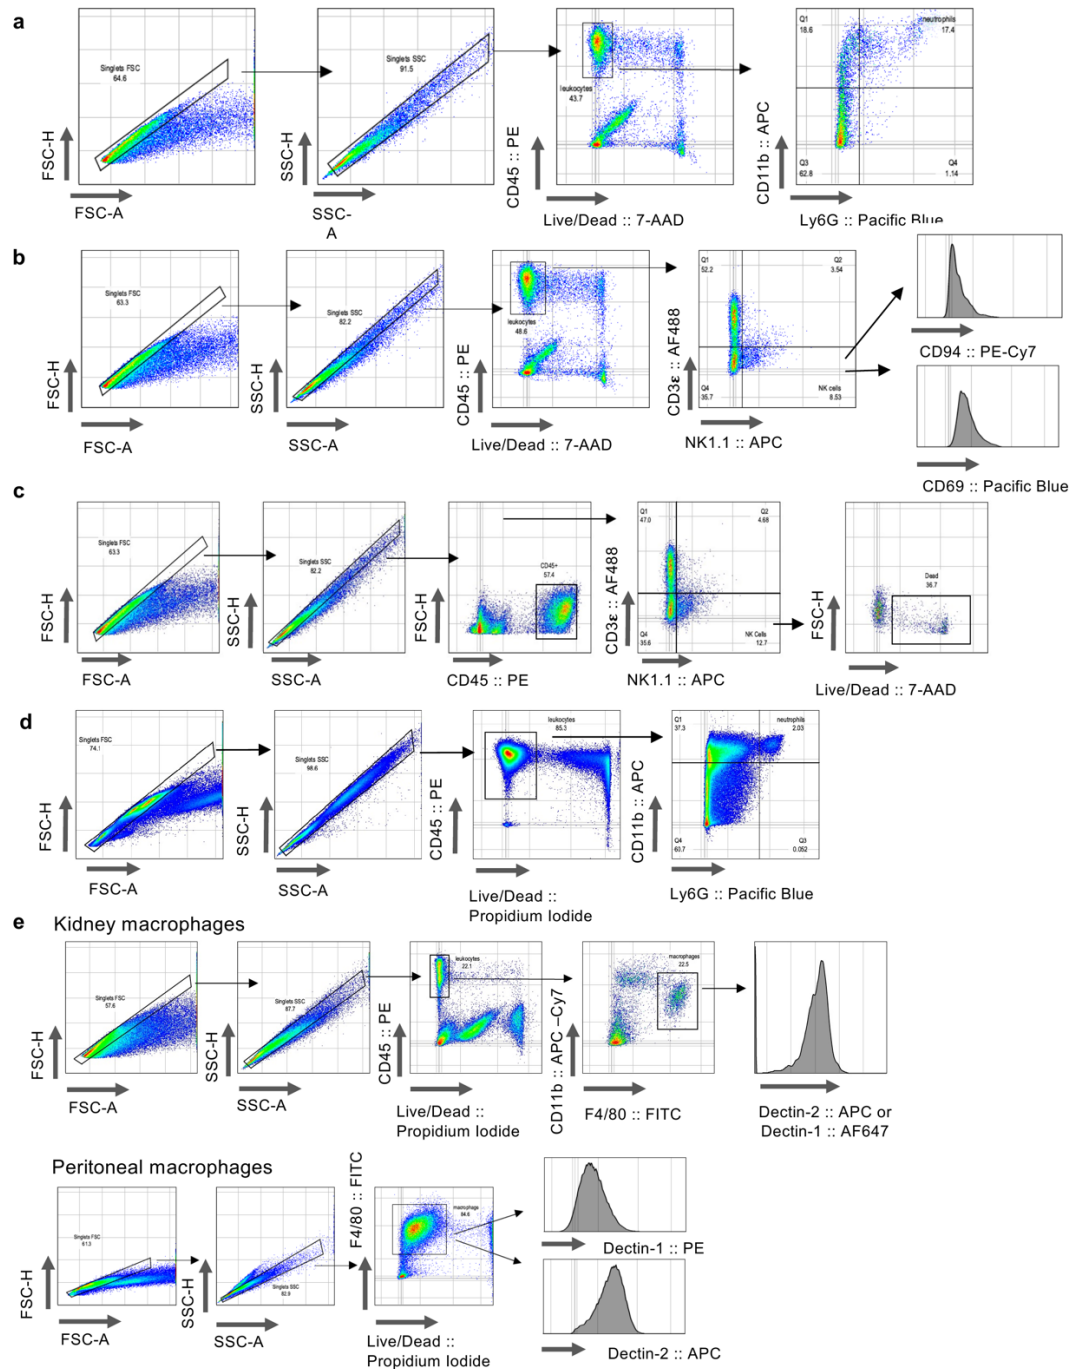

**Supplementary Figure 8**

**Supplementary Fig 8. Gating strategies for FACS analysis. Representative gating strategies to assess**

**a**, neutrophil infiltrate, **b**, NK cell population and **c**, dead NK cells in infected kidneys. **d**, Representative gating strategies to assess neutrophil infiltrate in the peritoneal cavity. **e**, Representative gating strategies to assess the expression of dectin-1 and dectin-2 in kidney macrophages and peritoneal macrophages.
