# Supplementary material
Source: publisher figshare collection journal article supplement (https://karger.figshare.com/articles/dataset/_/21923130)
Supplement: Supplementary file 6 [file 1]

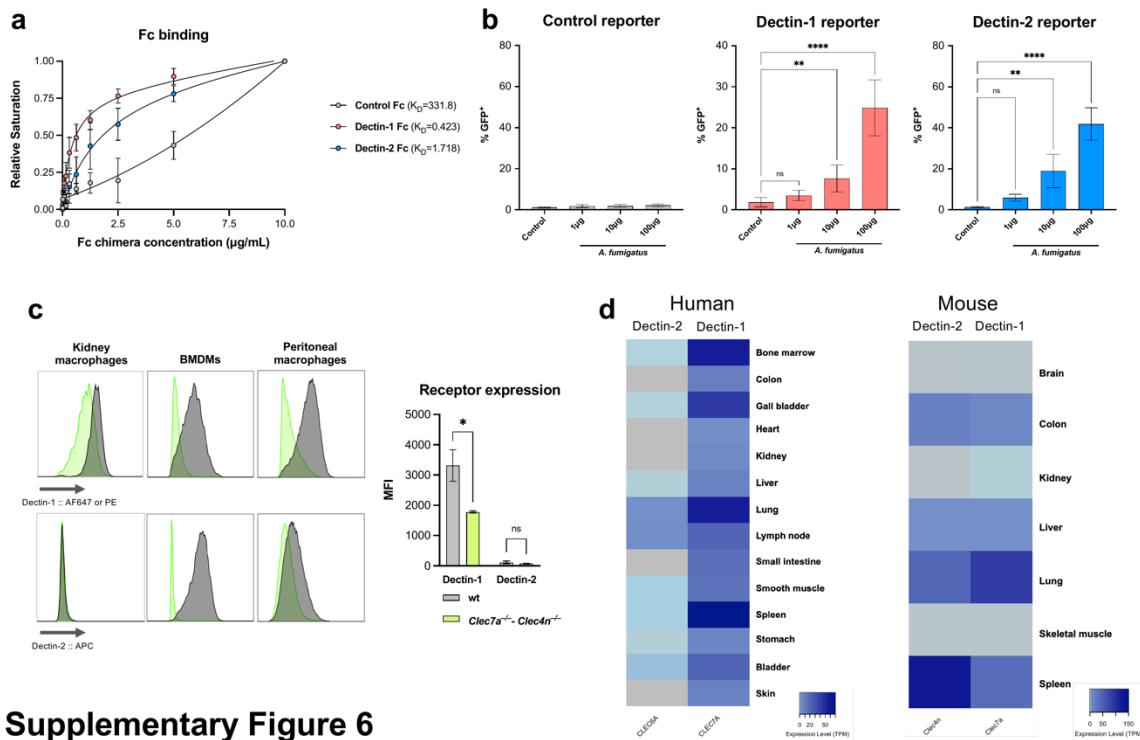

**Supplementary Figure 6**

**Supplementary Fig 6. Dectin-2 is not expressed in human or murine kidneys. a,** binding of *A. fumigatus* swollen conidia to dectin-1 or dectin-2 Fc chimeras assessed by ELISA assay.  $K_D$  values were calculated to form binding curves. Data from three independent experiments. **b,** binding of *A. fumigatus* swollen conidia to dectin-1 or dectin-2 reporter cells was assessed by their GFP expression in response to three doses of conidia (1, 10 and 100  $\mu\text{g}$ ). Data from three independent experiments. One-way ANOVA and Fisher's LSD posttest: \*\*  $p < 0.01$ ; \*\*\*\*  $p < 0.0001$ . **c,** surface expression of dectin-1 and dectin-2 by kidney macrophages, bone marrow-derived macrophages (BMDMs) and peritoneal macrophages was assessed by flow cytometry. Cells derived from *Clec7a*<sup>-/-</sup> *Clec4n*<sup>-/-</sup> mice were used as a negative control. Data from three independent experiments. Pairs were compared by t-test: \*  $p < 0.05$ . **d,** heatmaps showing gene expression of dectin-1 and dectin-2 in human and mouse samples. Expression levels are shown as values of transcripts per kilobase million (TPM) and were obtained from the public database Expression Atlas.
