# Supplementary material
Source: publisher figshare collection journal article supplement (https://karger.figshare.com/articles/dataset/_/21923130)
Supplement: Supplementary file 7 [file 1]

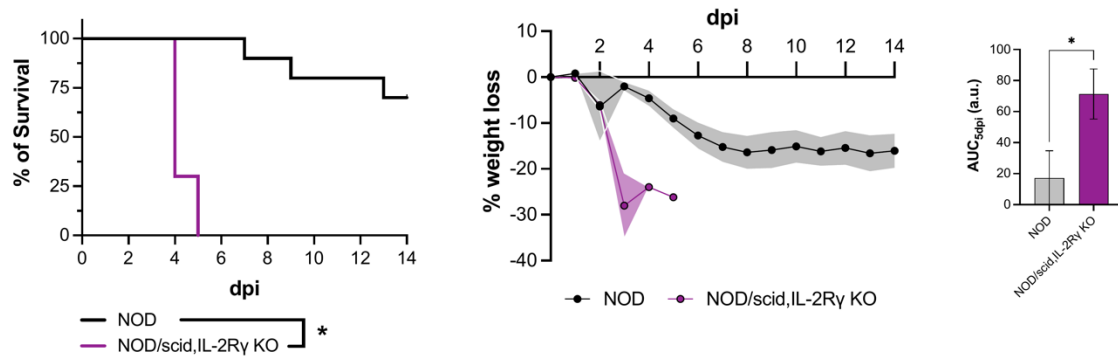

**Supplementary Figure 5**

**Supplementary Fig 5. Scid, IL-2R $\gamma$  knockout mice display enhanced susceptibility to *A. fumigatus* challenge.** NOD or NOD/*scid-IL2rg*<sup>-/-</sup> mice were challenged with  $5 \times 10^5$  conidia of *A. fumigatus*. Survival and body weight loss were monitored daily. Survival plot, *left panel*: Log-Rank test: \*  $p < 0.05$ . Body weight loss (BWL) and area under the curve (AUC, 5dpi), *middle and right plots*. Data is shown as mean  $\pm$  s.e.m (shadowed area in BWL plots). Unpaired t-test: \*  $p < 0.05$ .  $N = 10$  animals/group.
