# Supplementary material
Source: publisher figshare collection journal article supplement (https://karger.figshare.com/articles/dataset/_/21923130)
Supplement: Supplementary file 8 [file 1]

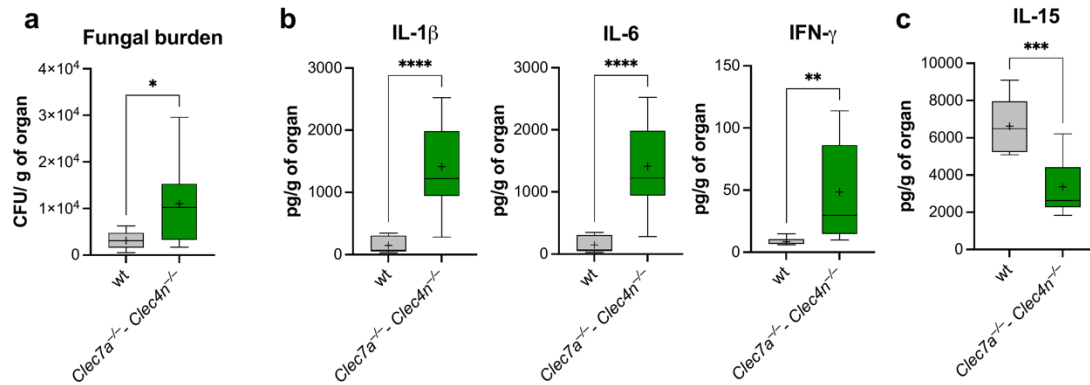

**Supplementary Figure 4**

**Supplementary Fig 4. *Clec7a*<sup>-/-</sup> *Clec4n*<sup>-/-</sup> mice display enhanced production of inflammatory cytokines and higher fungal load in the kidneys.** wt and *Clec7a*<sup>-/-</sup> *Clec4n*<sup>-/-</sup> mice were infected intravenously with 1 × 10<sup>6</sup> *A. fumigatus* conidia and analysis was performed at 5 days post-infection. **a**, Fungal burden in kidneys macerates is expressed as the number of colony-forming units per gram of tissue. **b**, cytokine levels for IL-1 $\beta$ , IL-6 and IFN- $\gamma$  in kidney macerates measured by CBA are expressed as pg of cytokine per gram of tissue. **c**, IL-15 levels in kidney macerates measured by ELISA shown as pg of cytokine per gram of tissue. Data are shown as boxplots (line indicates median and +, mean values). Unpaired t-test: \*  $p < 0.05$ ; \*\*  $p < 0.01$ ; \*\*\*  $p < 0.001$ ; \*\*\*\*  $p < 0.0001$ .  $N = 9-10$  animals/group, pooled from two independent experiments.
